# Supplementary material for: Single-cell data revealed the function of natural killer cells and macrophage cells in chemotherapy tolerance in acute myeloid leukemia
Source: PeerJ. 2024 Nov 21;12:e18521. doi: 10.7717/peerj.18521 (PMC11586048; doi:10.7717/peerj.18521)
Supplement: Supplemental Information 1 [file peerj-12-18521-s001.xls]

## Sheet: Sheet1
ITEM TO CHECK	IMPORTANCE	CHECKLIST
EXPERIMENTAL DESIGN
Definition of experimental and control groups	E	p8 line162-163
Number within each group	E	p8 line162-163
Assay carried out by core lab or investigator's lab?	D	Not Applicable
Acknowledgement of authors' contributions	D	Not Applicable
SAMPLE
Description	E	p8 line161
Volume/mass of sample processed	D	Not Applicable
Microdissection or macrodissection	E	p8-9 line167-172
Processing procedure	E	p8-9 line167-172
If frozen - how and how quickly?	E	p8-9 line167-172
If fixed - with what, how quickly?	E	p8-9 line167-172
Sample storage conditions and duration (especially for FFPE samples)	E	p8-9 line167-172
NUCLEIC ACID EXTRACTION
Procedure and/or instrumentation	E	p8-9 line167-172
Name of kit and details of any modifications	E	p8-9 line167-172
Source of additional reagents used	D	Not Applicable
Details of DNase or RNAse treatment	E	p8-9 line167-172
Contamination assessment (DNA or RNA)	E	p8-9 line167-172
Nucleic acid quantification	E	p8-9 line167-172
Instrument and method	E	p8-9 line167-172
Purity (A260/A280)	D	Not Applicable
Yield	D	Not Applicable
RNA integrity method/instrument	E	p8-9 line167-172
RIN/RQI or Cq of 3' and 5' transcripts	E	p8-9 line167-172
Electrophoresis traces	D	Not Applicable
Inhibition testing (Cq dilutions, spike or other)	E	p8-9 line167-172
REVERSE TRANSCRIPTION
Complete reaction conditions	E	p8-9 line167-172
Amount of RNA and reaction volume	E	p8-9 line167-172
Priming oligonucleotide (if using GSP) and concentration	E	p8-9 line167-172
Reverse transcriptase and concentration	E	p8-9 line167-172
Temperature and time	E	p8-9 line167-172
Manufacturer of reagents and catalogue numbers	D	Not Applicable
Cqs with and without RT	D*	Not Applicable
Storage conditions of cDNA	D	Not Applicable
qPCR TARGET INFORMATION
If multiplex, efficiency and LOD of each assay.	E	p8-9 line167-172
Sequence accession number	E	p8-9 line167-172
Location of amplicon	D	Not Applicable
Amplicon length	E	p8-9 line167-172
In silico specificity screen (BLAST, etc)	E	p8-9 line167-172
Pseudogenes, retropseudogenes or other homologs?	D	Not Applicable
Sequence alignment	D	Not Applicable
Secondary structure analysis of amplicon	D	Not Applicable
Location of each primer by exon or intron (if applicable)	E	p8-9 line167-172
What splice variants are targeted?	E	p8-9 line167-172
qPCR OLIGONUCLEOTIDES
Primer sequences	E	p8-9 line167-172
RTPrimerDB Identification Number	D	Not Applicable
Probe sequences	D**	Not Applicable
Location and identity of any modifications	E	p8-9 line167-172
Manufacturer of oligonucleotides	D	Not Applicable
Purification method	D	Not Applicable
qPCR PROTOCOL
Complete reaction conditions	E	p8-9 line167-172
Reaction volume and amount of cDNA/DNA	E	p8-9 line167-172
Primer, (probe), Mg++ and dNTP concentrations	E	p8-9 line167-172
Polymerase identity and concentration	E	p8-9 line167-172
Buffer/kit identity and manufacturer	E	p8-9 line167-172
Exact chemical constitution of the buffer	D	Not Applicable
Additives (SYBR Green I, DMSO, etc.)	E	p8-9 line167-172
Manufacturer of plates/tubes and catalog number	D	Not Applicable
Complete thermocycling parameters	E	p8-9 line167-172
Reaction setup (manual/robotic)	D	Not Applicable
Manufacturer of qPCR instrument	E	p8-9 line167-172
qPCR VALIDATION
Evidence of optimisation (from gradients)	D	Not Applicable
Specificity (gel, sequence, melt, or digest)	E	p8-9 line167-172
For SYBR Green I, Cq of the NTC	E	p8-9 line167-172
Standard curves with slope and y-intercept	E	p8-9 line167-172
PCR efficiency calculated from slope	E	p8-9 line167-172
Confidence interval for PCR efficiency or standard error	D	Not Applicable
r2 of standard curve	E	p8-9 line167-172
Linear dynamic range	E	p8-9 line167-172
Cq variation at lower limit	E	p8-9 line167-172
Confidence intervals throughout range	D	Not Applicable
Evidence for limit of detection	E	p8-9 line167-172
If multiplex, efficiency and LOD of each assay.	E	p8-9 line167-172
DATA ANALYSIS
qPCR analysis program (source, version)	E	p8-9 line167-172
Cq method determination	E	p8-9 line167-172
Outlier identification and disposition	E	p8-9 line167-172
Results of NTCs	E	p8-9 line167-172
Justification of number and choice of reference genes	E	p8-9 line167-172
Description of normalisation method	E	p8-9 line167-172
Number and concordance of biological replicates	D	Not Applicable
Number and stage (RT or qPCR) of technical replicates	E	p8-9 line167-172
Repeatability (intra-assay variation)	E	p8-9 line167-172
Reproducibility (inter-assay variation, %CV)	D	Not Applicable
Power analysis	D	Not Applicable
Statistical methods for result significance	E	p8-9 line167-172
Software (source, version)	E	p8-9 line167-172
Cq or raw data submission using RDML	D	Not Applicable
Table 1. MIQE checklist for authors, reviewers and editors. All essential information (E) must be submitted with the manuscript. Desirable
information (D) should be submitted if available. If using primers obtained from RTPrimerDB, information on qPCR target, oligonucleotides,
protocols and validation is available from that source.
*: Assessing the absence of DNA using a no RT assay is essential when first extracting RNA. Once the sample has been validated as
RDNA-free, inclusion of a no-RT control is desirable, but no longer essential.
**: Disclosure of the probe sequence is highly desirable and strongly encouraged. However, since not all commercial pre-designed assay
vendors provide this information, it cannot be an essential requirement. Use of such assays is advised against.
