# Supplementary material for: Single-cell data revealed the function of natural killer cells and macrophage cells in chemotherapy tolerance in acute myeloid leukemia
Source: PeerJ. 2024 Nov 21;12:e18521. doi: 10.7717/peerj.18521 (PMC11586048; doi:10.7717/peerj.18521)
Supplement: Supplemental Information 2 [file peerj-12-18521-s002.xlsx]

## Sheet: qPCR quantifications
		Cq	Cq Mean	target gene				expression	average		p value
HS-5	GAPDH	15.26	15.2733	25.2	9.92667	10.0433	-0.116667	1.08423	1.01091	0.175747		FCAR
HS-5	GAPDH	15.2	15.2733	25.13	9.85667	10.0433	-0.186667	1.13813
HS-5	GAPDH	15.36	15.2733	25.62	10.3467	10.0433	0.303333	0.810378
HAP1	GAPDH	15.23	15.16	24.08	8.92	10.0433	-1.12333	2.1785	2.13068	0.110217	0.000728819
HAP1	GAPDH	15.1	15.16	24.2	9.04	10.0433	-1.00333	2.00463
HAP1	GAPDH	15.15	15.16	24.06	8.9	10.0433	-1.14333	2.20891
HS-5	GAPDH	15.26	15.2733	29.43	14.1567	14.1233	0.0333333	0.97716	1.00599	0.135926		FCGR3A
HS-5	GAPDH	15.2	15.2733	29.57	14.2967	14.1233	0.173333	0.886791
HS-5	GAPDH	15.36	15.2733	29.19	13.9167	14.1233	-0.206667	1.15402
HAP1	GAPDH	15.23	15.16	28.08	12.92	14.1233	-1.20333	2.30271	2.2053	0.0992597	0.000247658
HAP1	GAPDH	15.1	15.16	28.21	13.05	14.1233	-1.07333	2.10429
HAP1	GAPDH	15.15	15.16	28.14	12.98	14.1233	-1.14333	2.20891
HS-5	GAPDH	15.26	15.2733	29.35	14.0767	13.88	0.196667	0.872564	1.00506	0.121793		PREX1
HS-5	GAPDH	15.2	15.2733	29	13.7267	13.88	-0.153333	1.11214
HS-5	GAPDH	15.36	15.2733	29.11	13.8367	13.88	-0.0433333	1.03049
HAP1	GAPDH	15.23	15.16	27.64	12.48	13.88	-1.4	2.63902	2.42924	0.347674	0.00258773
HAP1	GAPDH	15.1	15.16	28.02	12.86	13.88	-1.02	2.02792
HAP1	GAPDH	15.15	15.16	27.65	12.49	13.88	-1.39	2.62079
HS-5	GAPDH	15.26	15.2733	25.99	10.7167	10.7767	-0.06	1.04247	1.0005	0.0387985		S100A8
HS-5	GAPDH	15.2	15.2733	26.06	10.7867	10.7767	0.01	0.993092
HS-5	GAPDH	15.36	15.2733	26.1	10.8267	10.7767	0.05	0.965936
HAP1	GAPDH	15.23	15.16	24.49	9.33	10.7767	-1.44667	2.72578	2.55922	0.272347	0.00895392
HAP1	GAPDH	15.1	15.16	24.5	9.34	10.7767	-1.43667	2.70695
HAP1	GAPDH	15.15	15.16	24.77	9.61	10.7767	-1.16667	2.24492
HS-5	GAPDH	15.26	15.2733	26.43	11.1567	11.1567	0	1	1.00026	0.0277303		S100A9
HS-5	GAPDH	15.2	15.2733	26.47	11.1967	11.1567	0.04	0.972655
HS-5	GAPDH	15.36	15.2733	26.39	11.1167	11.1567	-0.04	1.02811
HAP1	GAPDH	15.23	15.16	24.79	9.63	11.1567	-1.52667	2.88119	2.82145	0.322069	0.00984955
HAP1	GAPDH	15.1	15.16	24.68	9.52	11.1567	-1.63667	3.10947
HAP1	GAPDH	15.15	15.16	25.01	9.85	11.1567	-1.30667	2.47369

## Sheet: qPCR raw data
Hole	Channel	CT	TM	Target gene	Sample name
A01	FAM	25.2	80.5	FCAR	HS-5
A02	FAM	25.13	80.5	FCAR	HS-5
A03	FAM	25.62	80.5	FCAR	HS-5
A04	FAM	24.08	80.5	FCAR	HAP1
A05	FAM	24.2	80.5	FCAR	HAP1
A06	FAM	24.06	80.5	FCAR	HAP1
A07	FAM	29.43	84	FCGR3A	HS-5
A08	FAM	29.57	84	FCGR3A	HS-5
A09	FAM	29.19	84	FCGR3A	HS-5
A10	FAM	28.08	84	FCGR3A	HAP1
A11	FAM	28.21	84	FCGR3A	HAP1
A12	FAM	28.14	84	FCGR3A	HAP1
B01	FAM	29.35	84.5	PREX1	HS-5
B02	FAM	29	84.5	PREX1	HS-5
B03	FAM	29.11	84.5	PREX1	HS-5
B04	FAM	27.64	84.5	PREX1	HAP1
B05	FAM	28.02	84.5	PREX1	HAP1
B06	FAM	27.65	84.5	PREX1	HAP1
B07	FAM	25.99	87	S100A8	HS-5
B08	FAM	26.06	87	S100A8	HS-5
B09	FAM	26.1	87	S100A8	HS-5
B10	FAM	24.49	87	S100A8	HAP1
B11	FAM	24.5	87	S100A8	HAP1
B12	FAM	24.77	87	S100A8	HAP1
C01	FAM	26.43	81	S100A9	HS-5
C02	FAM	26.47	81	S100A9	HS-5
C03	FAM	26.39	81	S100A9	HS-5
C04	FAM	24.79	81	S100A9	HAP1
C05	FAM	24.68	81	S100A9	HAP1
C06	FAM	25.01	81	S100A9	HAP1
C07	FAM	15.26	87.5	GAPDH	HS-5
C08	FAM	15.2	87.5	GAPDH	HS-5
C09	FAM	15.36	87.5	GAPDH	HS-5
C10	FAM	15.23	87.5	GAPDH	HAP1
C11	FAM	15.1	87.5	GAPDH	HAP1
C12	FAM	15.15	87.5	GAPDH	HAP1

## Sheet: invasion
HAP1		si-NC	si-S100A8	P
	Invasion	834	243	0.00320277
		970	254
		940	266

## Sheet: wound
si-NC	blank area		Migration rate%		si-S100A8	blank area		Migration rate%		p
1	1086978	990084			1	911333	1		923427
1	913942				1	948820	1
1	969333				1	910128	1
1	590634	0.596549	0.403451		1	669056	0.724536	0.275464		0.00053158
1	589950	0.595858	0.404142		1	678228	0.734468	0.265532
1	615550	0.621715	0.378285		1	654046	0.708281	0.291719
